# Supplementary material for: Impact of anesthesia modalities on functional outcome of mechanical thrombectomy in patients with acute ischemic stroke: a subgroup analysis of DIRECT-MT trial
Source: Eur J Med Res. 2023 Jul 10;28:228. doi: 10.1186/s40001-023-01171-x (PMC10332003; doi:10.1186/s40001-023-01171-x)
Supplement: Supplementary file 1 — Additional file 1: Figure S1. The adjusted logistic regression for the functional outcome between general anesthesia and non-general anesthesia group. CI, confidence interval; eTICI, extended thrombolysis in cerebral infarction score; mRS, modified Rankin Scale; OR, odds ratio. Figure S2. Logistic regression for the difference in safety outcomes and technical complications between the two treatment groups. Non-GA, non-General Anesthesia; GA, General Anesthesia. [file 40001_2023_1171_MOESM1_ESM.pdf]

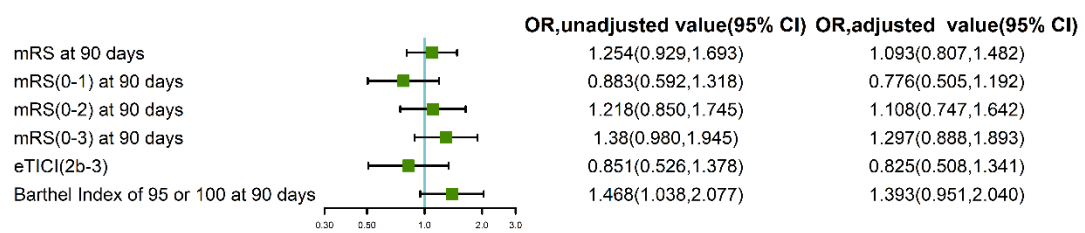

eFigure 1 The adjusted logistic regression for the functional outcome between general anesthesia and non-general anesthesia group  
 CI, confidence interval; eTICI, extended thrombolysis in cerebral infarction score; mRS, modified Rankin Scale; OR, odds ratio;

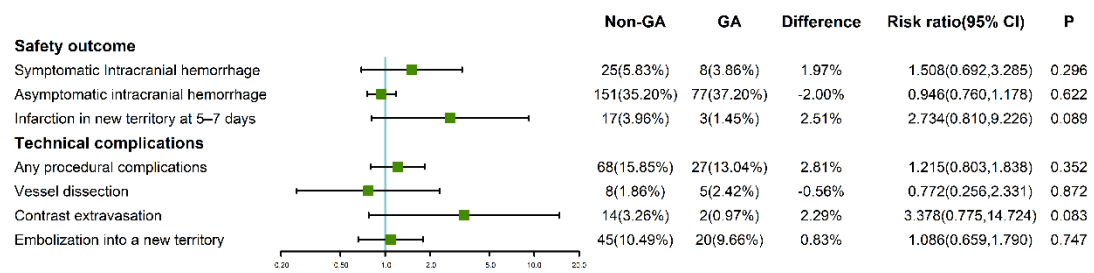

eFigure 2 Logistic regression for the difference in safety outcomes and technical complications between the two treatment groups  
Non-GA, non-General Anesthesia; GA, General Anesthesia;
